# Supplementary material
Source: HighWire-hosted journal article supplement (http://www.annfammed.org/highwire/filestream/7813/field_highwire_adjunct_files/0/221supp.pdf)
Supplement: 221supp.pdf [file 221supp.pdf]

**Online Supplementary Material**

Harper DM, Longacre MR, Noll WW, Belloni BS, Cole BF. Factors affecting the detection rate of human papillomavirus. *Ann Fam Med* 2003;1:221-227.

<http://www.annfammed.org/cgi/content/full/1/4/221>

**Supplemental Table. Percentage of Samples Positive for Human Papillomavirus (HPV) by Sampling Time**

|        | High-Risk HPV |                  | Any HPV |                  |
|--------|---------------|------------------|---------|------------------|
|        | No.           | % (95% CI)       | No.     | % (95% CI)       |
| Week 1 | 130/412       | 31.6 (27.1–36.3) | 196/412 | 47.6 (42.7–52.5) |
| Week 2 | 52/270        | 19.3 (14.7–24.5) | 102/270 | 37.8 (32.0–43.9) |
| Week 3 | 71/263        | 27.0 (21.7–32.8) | 105/263 | 39.9 (34.0–46.1) |
| Week 4 | 66/244        | 27.0 (21.6–33.1) | 90/244  | 36.9 (30.8–43.3) |

Note: The distribution of women positive for HPV was not different among weeks.  
 CI = confidence interval.
